# Supplementary material
Source: PubMed Central journal article supplement (PMC4136222)
Supplement: IAI.01739-14_zii999090786so1.pdf [file IAI.01739-14_zii999090786so1.pdf]

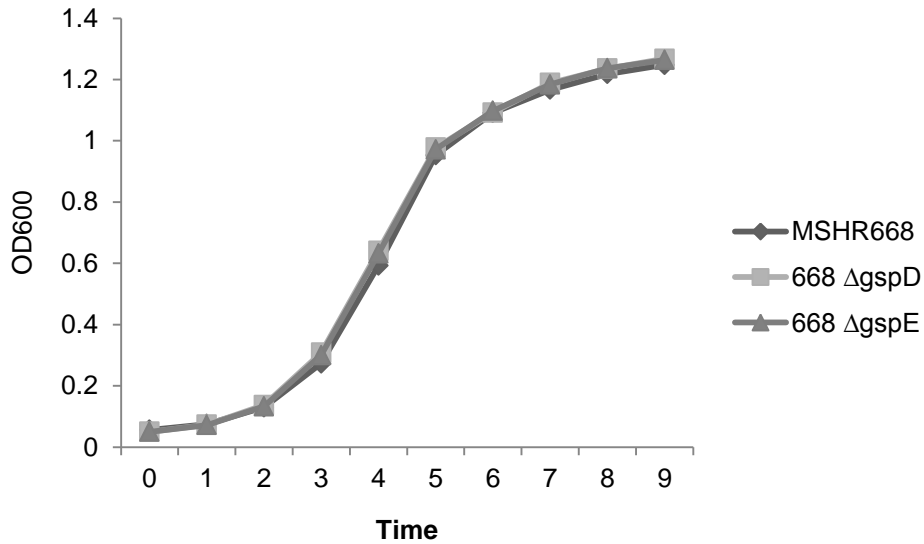

Figure S1. Growth of *B. pseudomallei* wild-type and T2SS mutants in LB broth. Strains were inoculated in LB broth and grown aerobically for 16-18 h at 37°C and 250 r.p.m. Two hundred microliters of saturated culture was used to inoculate 30 ml of LB broth in a 125 ml disposable Erlenmeyer flask (Corning) and grown for 9 h as described above. The OD<sub>600</sub> of each culture was assessed hourly using a DU 530 Beckman spectrophotometer and the results were depicted graphically with Microsoft Excel 2010.

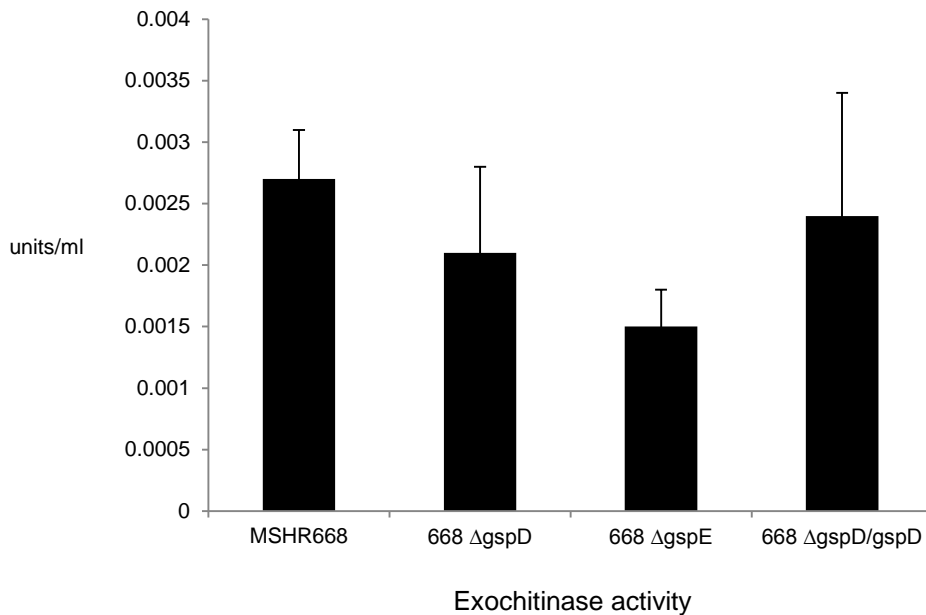

Figure S2. Quantitative enzymatic assay of secreted exochitinase activity. Bacterial strains were grown in LB broth for 22 h at 37°C with shaking (250 r.p.m.) and the supernatants were filtered and assayed for exochitinase activity as described in the Materials and Methods. One unit of activity releases 1 mmole of *p*-nitrophenol from 4-Nitrophenyl *N*-acetyl-β-D-glucosamide per min at pH 4.8 at 37°C. All numerical values are the means of three separate experiments performed in triplicate plus standard deviations (error bars). There was no significant difference between any of the strains with regards to exochitinase activity ( $p>0.1$ ).

```

ID TssM
FT SIGNAL 1 20
FT REGION 1 6 N-REGION.
FT REGION 7 15 H-REGION.
FT REGION 16 20 C-REGION.
FT TOPO_DOM 21 474 NON CYTOPLASMIC.
//

```

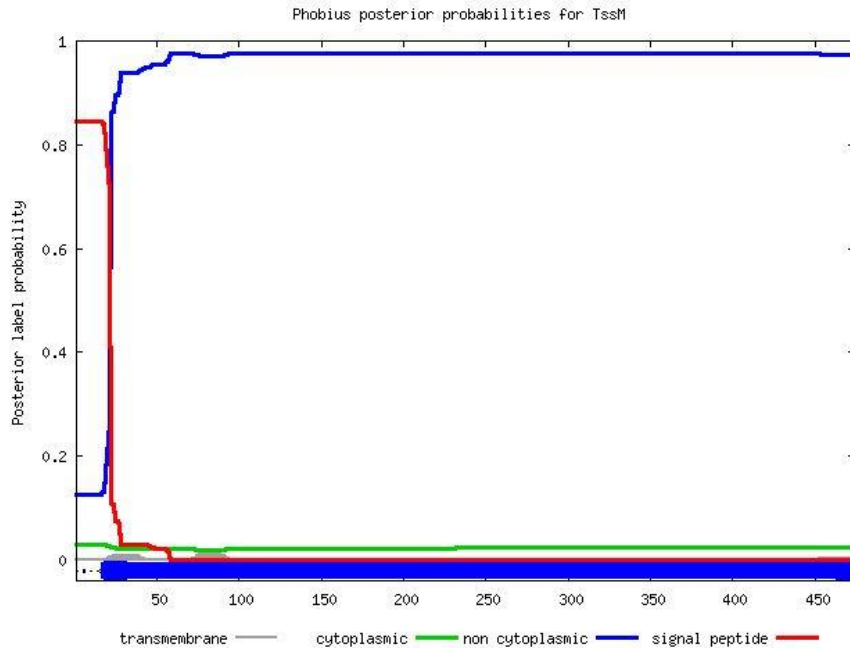

Figure S3. The Phobius server predicts a putative signal peptide on TssM. The TssM N-terminal sequence, MNARRPAFGLIASHASRRRAVE, contained a N-region (MNARRP), a H-region (AFGLIASHA), and a C-region (SRRRA) (Fig. S3). Phobius predicted the most likely TssM cleavage site to be between amino acids 20 and 21 (RRA-VE).
